# Supplementary material for: Single nucleotide resolution RNA-seq uncovers new regulatory mechanisms in the opportunistic pathogen Streptococcus agalactiae
Source: PubMed Central journal article supplement (PMC4448216; doi:10.1186/s12864-015-1583-4), 2015-05-30
Supplement: 12864_2015_1583_MOESM1_ESM.pdf [file 12864_2015_1583_MOESM1_ESM.pdf]

**Additional file 1: Number of reads mapped in the 22 dRNAseq and RNAseq experiments**

| Strain        | Condition                             | Sample | Number of reads after adapter trimming | Mapped reads | Number of reads mapped to non rRNA regions |
|---------------|---------------------------------------|--------|----------------------------------------|--------------|--------------------------------------------|
| wt            | mix <sup>1</sup> (MG)                 | TAP+   | 12.1 M                                 | 11.7 M       | 4.7 M                                      |
| wt            | mix <sup>1</sup> (MG)                 | TAP-   | 10.4 M                                 | 10.0 M       | 2.5 M                                      |
| wt            | Late exponential (LE)                 | TAP+   | 14.5 M                                 | 12.6 M       | 2.4 M                                      |
| wt            | Late exponential (LE)                 | TAP-   | 14 M                                   | 11.7 M       | 1.1 M                                      |
| wt            | mid-exponential (midE)                | TAP+   | 22.9 M                                 | 21.9 M       | 7.6 M                                      |
| wt            | mid-exponential (midE)                | TAP-   | 16.2 M                                 | 15.4 M       | 2.2 M                                      |
| wt            | mid-exponential, 20 min pH5.2 (AcSt)  | TAP+   | 6.5 M                                  | 6.2 M        | 2.6 M                                      |
| wt            | mid-exponential, 20 min pH5.2 (AcSt)  | TAP-   | 5.3 M                                  | 5.0 M        | 0.9 M                                      |
| <i>ΔciaRH</i> | Late exponential ( <i>ΔciaRHLE</i> )  | TAP+   | 11.8 M                                 | 11.6 M       | 6.5 M                                      |
| <i>ΔciaRH</i> | Late exponential ( <i>ΔciaRHLE</i> )  | TAP-   | 17.9 M                                 | 17.4 M       | 2.7 M                                      |
| <i>ΔcovRS</i> | mid-exponential ( <i>ΔcovRSmidE</i> ) | TAP+   | 13.5 M                                 | 13.2 M       | 4.3 M                                      |
| <i>ΔcovRS</i> | mid-exponential ( <i>ΔcovRSmidE</i> ) | TAP-   | 15.0 M                                 | 14.6 M       | 2.4 M                                      |
| <i>ΔcovRS</i> | Late exponential ( <i>ΔcovRSLE</i> )  | TAP+   | 11.7 M                                 | 11.3 M       | 3.4 M                                      |
| <i>ΔcovRS</i> | Late exponential ( <i>ΔcovRSLE</i> )  | TAP-   | 8.7 M                                  | 8.6 M        | 2.1 M                                      |
| <i>ΔrelRS</i> | mid-exponential ( <i>ΔrelRSmidE</i> ) | TAP+   | 19.9 M                                 | 19.5 M       | 5.7 M                                      |
| <i>ΔrelRS</i> | mid-exponential ( <i>ΔrelRSmidE</i> ) | TAP-   | 25.6 M                                 | 24.9 M       | 4.4 M                                      |
| wt            | mid-exponential (midE)                | RNAseq | 15.9 M                                 | 14.6 M       | 5.7 M                                      |
| wt            | mid-exponential (midE)                | RNAseq | 13.0 M                                 | 11.8 M       | 5.4 M                                      |
| wt            | mid-exponential (midE)                | RNAseq | 13.5 M                                 | 12.5 M       | 5.5 M                                      |
| wt            | mid-exponential, 20 min pH5.2 (AcSt)  | RNAseq | 17.3 M                                 | 15.8 M       | 7.8 M                                      |
| wt            | mid-exponential, 20 min pH5.2 (AcSt)  | RNAseq | 21.5 M                                 | 19.2 M       | 8.8 M                                      |
| wt            | mid-exponential, 20 min pH5.2 (AcSt)  | RNAseq | 15.4 M                                 | 14.0 M       | 6.8 M                                      |

<sup>1</sup>: mix relates to a mixture of RNAs prepared in rich culture medium (TH) in exponential and stationary growth phases and in minimal culture medium (RPMI) at the end of exponential phase
