# Supplementary material for: Single nucleotide resolution RNA-seq uncovers new regulatory mechanisms in the opportunistic pathogen Streptococcus agalactiae
Source: PubMed Central journal article supplement (PMC4448216; doi:10.1186/s12864-015-1583-4), 2015-05-30
Supplement: 12864_2015_1583_MOESM9_ESM.pdf [file 12864_2015_1583_MOESM9_ESM.pdf]

S.dysgalactiae -TAAAAAACAGAAAGGAAGTCTGCAATGGCCCAAC--ACAACAT--TAACATAATT 55  
 S.pyogenes -AAAAAACAGAAAGGAAGTCA-ATGATGGTAAAAAC--ACAACACT--TAGCAAATT 53  
 S.lutetiensis ---AAAAAACACAGGAGGAAGCTAAGATATGAACATGAC--ACAACACT--TTACAAGTT 53  
 S.gallolyticus ---AAAAAACACAGGAGGAAGCTAAGAT--GAACATGAC--ACAACACT--TTACAAGTT 51  
 S.agalactiae --AGAAAAATTATGAGAAAGGATGACTAGTAAATGACT--AAAAATTATTTACCAATT 56  
 S.equi -TAAAAAACAGAAAGGAAATCC--AAGATGAAGCAAAC--ACAGCATA--TGATAAATT 54  
 S.iniae AAAAAATAACTGAAAGGAAGTCCACA--TGACACAC--A-AACACTTAGCATCACTT 55  
 S.uberis ----AAAAAACAGAAAGGAAGTCCAAAGT--AATGAAC--ACAACATGAAGCAAAT 50  
 F.nucleatum ----AAATCAAAGGAGGAAGTTCGCAATGAAGCAAATACTAACACAACATATGAGATATT 56  
 L.garvieae ----AAAAAACAGAAAGGAAGTCCAAAGT--AGCAAAAC--ACTTCCATGACAGCTC 42  
 E.faecalis ---GGAAAATACATGACACAATTTACTA---ACGTAAA--AGAAATGCACCAATCA--T 49  
 S.pasteurianus --AAAAAACACAGGAGGAAGCTAAGAT---GAACAACACACAATTC--TTACAAGTT 52  
 L.lactis -AAAAAAATTAAGAAAGGAGTCCGCAT---GAAAAAC--ACAACAAT--CAACAGCTC 50  
 S.parauberis AAAAAATACATGAGGAAAGTGTAGAT---GACAAAC--ACAATGATAAATCAATTAATT 54  
 E.casseliflavus -----GGAGGAACAATCATGAAACTATTTATTC--CATTGCAAGTGAATCAT 46

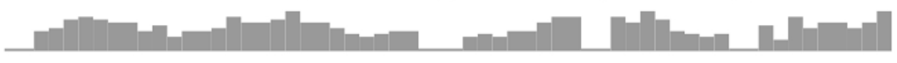

(((((.....((((((((.....((((((((((((.....))))))))))))))))))))))

S.dysgalactiae GGCAAAGCTGG **CATAGATAAG--TTGTGTTTATGGATTG-----GCATAGATACGACTTT** 108  
 S.pyogenes GGCAAAGCTGG **CATAGATAAG--TTGTGTTTATCAATTG-----GCATAGATACGACTTT** 106  
 S.lutetiensis GGCAAAGCTGG **CATAGATAAG--TTGTGTTTATGTTGTT-----GCATAGATACGACTTT** 108  
 S.gallolyticus GGCAAAGCTGG **CATAGATAAG--TTGTGTTTATGTTT-----GCATAGATACGACTTT** 105  
 S.agalactiae GGCAAAGCTGG **CATAGATAAG--TTGTGTTTATGGT-----GCATAGATACGACTTT** 108  
 S.equi GGCAAAGCTGG **CATAGATAAG--TTGTGTTTATGGTTA-----GCATAGATACGACTTT** 108  
 S.iniae GGCAAAGCTGG **CATAGATAAG--TTGTGTTTATGGAGC-----GCATAGATACGACTTT** 107  
 S.uberis GGCAAAGCTGG **CATAGATAAG--TTGTGTTTATGCATC-----GCATAGATACGACTTT** 104  
 F.nucleatum GGCAAAGCTGG **CATAGATAAG--TTGTGTTTATGGTTAG-----GCATAGATACGACTTT** 111  
 L.garvieae ATTTCTTTTGG **GCAGATAAG--TTGTGTTTATGCTTA-----GCATAGATACGACTTT** 94  
 E.faecalis GGCAAAGCTGG **CATAGATAAG--TTGTGTTTATGATTC-----GCATAGATACGACTTT** 102  
 S.pasteurianus GGCAAAGCTGG **CATAGATAAG--TTGTGTTTATGTTT-----GCATAGATACGACTTT** 106  
 L.lactis TTTATTTTGG **GCAGATAAG--TTGTGTTTATGCAATG-----GCATAGATACGACTTT** 104  
 S.parauberis GGCAAAGCTGG **CATAGATAAG--TTGTGTTTATGATTG-----GCATAGATACGACTTT** 108  
 E.casseliflavus GGCAAAGCTGG **CATAGATAAG--TTGTGTTTATGGACCTCATTCCATAGATACGACTTT** 103

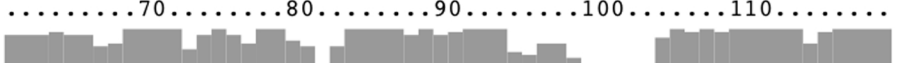

(((((.....((((((((.....((((((((((((.....))))))))))))))))))))))

S.dysgalactiae T--AGAGTACTTCTAAAAGG--**TATCATG**---CGCTA---AGATTGGATT--- 151  
 S.pyogenes T--AGAGTACTTCTAAAAGA--**TATCATG**---CGCTG---ACATTGGATT--- 149  
 S.lutetiensis T--GGAGTACTTCTAAAAG--**TATCATG**---CGCTA---ATCTTAGTTACAA-G 153  
 S.gallolyticus T--GGAGTACTTCTAAAAG--**TATCATG**---CGCTA---ATCTTAGTTACAAAG 151  
 S.agalactiae T--GGAGTACTTCTAAAAG--**TATCATG**---CGCTG---GTCTAGTCTAACAA-- 153  
 S.equi T--AGAGTACTTCTAAAAGG--**TATCATG**---CGCTG---ACATTGGATTCA-- 153  
 S.iniae T--AGAGTACTTCTAAAAG--**TATCATG**---CGCTG---ATTTTGGATTGA-- 151  
 S.uberis T--AGAGTACTTCTAAAAG--**TATCATG**---CGCTA---ATACTCTGAT--- 145  
 F.nucleatum T--AGTGTACTCTAAAAG--**TATCATG**TCAGCGATATAGAAATCCTTAATATATAT 165  
 L.garvieae T--GAGTACTTCTAAAAG--**TATCATG**---CGCTG---CCCGTAT--- 127  
 E.faecalis AGAAGACTTATCTAAAAGTG--**TATCATG**---CTG---GTTATATTCAA-G 147  
 S.pasteurianus T--GGAGTACTTCTAAAAG--**TATCATG**---CGCTA---ATCTTAGTTACAGGA 152  
 L.lactis T--GAGTACTTCTAAAAG--**TATCATG**---CGCTG---CCGGATTCAA-- 137  
 S.parauberis T--AGAGTACTTCTAAAATAC--**TATCATG**---CGCTA---GTCTTAGTATCA-- 153  
 E.casseliflavus TTAGAGAACCTCTAAAAGTGCTG--**TATCATG**---TGGTA---GTTGAATTT--- 149

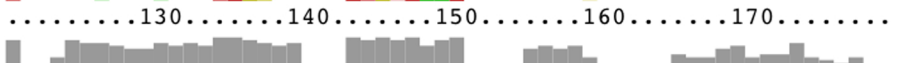

(((((.....((((((((.....((((((((((((.....))))))))))))))))))))))

S.dysgalactiae -CACAAAGAGC-GCCTAGTAG--TCA-TTACTAAGTGCCTTTT 188  
 S.pyogenes -CACAAAGAGC-GCCTAGTAA--TCA-TTACTAAGTGCCTTTT 186  
 S.lutetiensis ATAAAAAGC-GTGTAGTAA--GCAATTAAGTGCCTTTTTC 192  
 S.gallolyticus ATAAAAAGC-GTGTAGTAA--GCAATTAAGTGCCTTTTTC 190  
 S.agalactiae -ATAGAGAGC-GCAAGTAAAG-TTATTTATCAGGCGCTTTT 192  
 S.equi --AAAAAGC-GCCTAGTAG--CTGATTAAGTGCCTTTTTC 190  
 S.iniae --CAAAAAGC-GCCTAGTAT--CTGTTTACTAAGTGCCTTTT 188  
 S.uberis --AAAAAGC-GCTTAGTAGACTCTGACTGGGTGCCTTTT 184  
 F.nucleatum GGATAAAAGCTGCATGTAATGATTAAGTGCCTTTTTC 207  
 L.garvieae --AAAAAGC--CGGTTAAA--TTGCCCGGCTTTTTC 158  
 E.faecalis AAGAAAAACAGCACATAGAGGACCATCTATGTGGTGTTC 189  
 S.pasteurianus TAAAAAGGC-GTGTAGTAA--TTTACTAGACGCTTTTTC 191  
 L.lactis ---AGAAGACC-GATAGTAAA--AACTATCTGGTCTTTTTC 173  
 S.parauberis ---AAAAAGC-GCTTAGTAA--TTTACTTTGCGCTTTTTC 188  
 E.casseliflavus ---ATCGCCGCATAGGACA--AGCTTCTATGCGGCTTTT 183

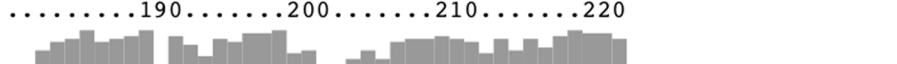

| Abbreviation    | species                                                          | Acc. number    | downstream protein | Protein annotation                                      |
|-----------------|------------------------------------------------------------------|----------------|--------------------|---------------------------------------------------------|
| S.agalactiae    | <i>Streptococcus agalactiae</i> NEM316                           | NC_004368.1    | Gbs1262            | putative ABC transport system substrate-binding protein |
| S.equi          | <i>Streptococcus equi</i> subsp. equi 4047                       | emb FM204883.1 | SEQ_1412           | putative exported protein                               |
| S.iniae         | <i>Streptococcus iniae</i> strain ISNO                           | gb CP007587.1  | DW64_03725         | peptide ABC transporter substrate-binding protein       |
| S.uberis        | <i>Streptococcus uberis</i> 0140J                                | emb AM946015.1 | SUB1110            | putative exported protein                               |
| S.gallolyticus  | <i>Streptococcus gallolyticus</i> subsp. gallolyticus ATCC 43143 | dbj AP012053.1 | SGGB_0836          | putative ABC transport system substrate-binding         |
| S.pyogenes      | <i>Streptococcus pyogenes</i> M1 GAS                             | gb AE004092.2  | M5005_Spy_0743     | ABC transporter substrate-binding protein               |
| F.nucleatum     | <i>Fusobacterium nucleatum</i> subsp. animalis 7_1               | gb CP007062.1  | FSDG_01183         | tryptophan synthase beta chain                          |
| L.garvieae      | <i>Lactococcus garvieae</i> ATCC 49156                           | dbj AP009332.1 | LCGT_0748          | amino acid transporter protein                          |
| E.faecalis      | <i>Enterococcus faecalis</i> str. Symbioflor                     | emb HF558530.1 | YP_007152865.1     | ABC transporter, substrate binding protein              |
| L.lactis        | <i>Lactococcus lactis</i> subsp. cremoris KW2                    | gb CP004484.1  | kw2_1881           | amino acid permease                                     |
| S.lutetiensis   | <i>Streptococcus lutetiensis</i> 033                             | gb CP003025.1  | KE3_0731           | putative ABC transport system substrate-binding protein |
| S.pasteurianus  | <i>Streptococcus pasteurianus</i> ATCC 43144                     | dbj AP012054.1 | SGPB_0721          | putative ABC transport system substrate-binding protein |
| S.parauberis    | <i>Streptococcus parauberis</i> KCTC 11537                       | NC_015558      | STP_0962           | putative ABC transport system                           |
| S.dysgalactiae  | <i>Streptococcus dysgalactiae</i> subsp. equisimilis RE378       | NC_018712      | GGG_1139           | ABC transporter, substrate binding protein              |
| E.casseliflavus | <i>Enterococcus casseliflavus</i> EC20                           | NC_020995      | ECBG_00979         | ABC transporter, substrate binding protein              |
