# Supplementary material for: Single nucleotide resolution RNA-seq uncovers new regulatory mechanisms in the opportunistic pathogen Streptococcus agalactiae
Source: PubMed Central journal article supplement (PMC4448216; doi:10.1186/s12864-015-1583-4), 2015-05-30
Supplement: 12864_2015_1583_MOESM10_ESM.pdf [file 12864_2015_1583_MOESM10_ESM.pdf]

S.pneumoniae -----TGAATCAAAACTTTTAC TTTAGCTACTT TAGATAGT---GTTTGTAG-ACATGTCA 52  
S.parasanguinis -----CAATTCAAAAATTTTAC TTTAGCTACTT TAGATAGT---GTTTGTAG-ACATGATC 52  
A.urinae -----ATTTTAC TTTAGCTACTT TAGATAGC---GTTTGTACTATGAAACA 43  
S.uberis -----TTAC TTTAGCTTCTT TAGATAGT---GTTTGTAGTCATGAGTT 40  
E.faecium --CACAACTGAATAACTTTTAC TTTAGCTACTT TAGATAG---GTTTGTATTCATCA--- 52  
E.hirae -----AATAACTTTTAC TTTAGCTACTT TAGATAG---GTTTGTATTCATGAA--- 45  
E.faecium\_aroF -----TATTAC TTTAGCTACTT TAGATAG---GTTTGTATTCATGACT--- 40  
C.maltaromaticum -----AATACTTTTTTTC TTTAGCTACTT TAGATAGT---GTTTGTGTACATGAAAA 48  
S.gallolyticus -----AAATCATTACTATTAC TTTAGTTTCTT TAGATAGA-CGTTTGTAGCCAAT--- 49  
S.thermophilus ---CTTAAAGC-TTGTTATTAC TTTAGTTTCTT TAGATAGGGC GTTTGTGTTTCA---- 51  
S.agalactiae ACAAACAATACTTATTATTAC TTTAGTTTCTT TAGATAGA-CGTTTGTAGCCTC---- 54

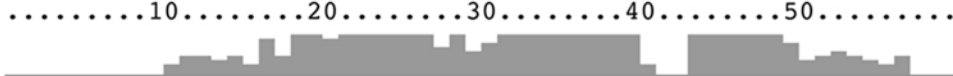

.....)))).))))).....((((.....))))).....)).....  
S.pneumoniae -CCATGGATGCAAAACAGTTC AAGCAATTTGTTTGTATCTATG-TGGCTAAGATTTTTGAT 110  
S.parasanguinis -TCATGGATGCAAAACAACCC AAGCAATTTGTTTGTATCTATG-TGGCTAAGATTTTTGAT 110  
A.urinae -TCATAGATACAAACGTCAAAC TCAA---GTTTGTATCTATGATGGCTAAGGACTCTTAAG 99  
S.uberis -TCATGGATACAAACACGTTA AACGTTACGTTGTATCTATG-AGGCTAAGGACTTTTTG 98  
E.faecium -TGATGGATACAAACG--TTA AACGAC-AGTTTGTATCTATGATGGCTAAGA AACTTTGT 108  
E.hirae -TTATGGATACAAACA--CC AAACAACCTGGTTGTATCTATGATGGCTAAGA AACTTTGT 102  
E.faecium\_aroF -TCGTGGGTACAAAC--- AAACAG--GTTTGTATCTATGATGGCTAAGA AACTTTTTA 92  
C.maltaromaticum ATCATGGATGCAAAAC--- CGAA-AT--GTTTGTGCTATGGGGCTGAAGGATTTTTAAC 100  
S.gallolyticus --CATGGATGCAAAACG--TCAT--ACC--GTTTGTATCTATG-AAGCTAAGCATTTTAC 100  
S.thermophilus ----AGATACAAAGC--TCAA--TAA--GTTTGTATCTATG-AAGCTAAGCATTTTGT 99  
S.agalactiae ----AAGGATACAAACG--TC ACGCAA--GTTTGTATCTATG-AAGCTAAGCATTTTGT 106

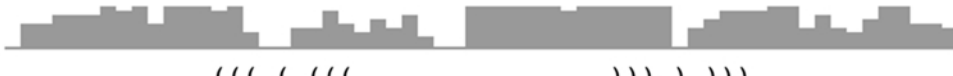

.....(((.(.....)))).)).....  
S.pneumoniae TGTTG-----GTCCATATAGA-TGAATA---TCTAAATGGACTAGCTAAG-TTGTAAC 157  
S.parasanguinis GATG-----GTCCATAGAGC-T-AGTA---TCTAAATGGACCGAG-GTT-TTGTAAC 155  
A.urinae CGTGTCT---AGCCCTCATAGAATGGATAAAATCTAAATGGGCTATACCAC-TATTAAT 154  
S.uberis AGTTGTT---TGTCCACATAGA-TAAAAATA-TCTAAGTGGACGCTACCATACAGCAAG 152  
E.faecium ATTGCAGCAAAAAGCCACGTAGACAAAATGCTAAGTGGCTGAGCAGTGAAA-TACAAAG 167  
E.hirae ATTACGC---AAAAGCCAGTAGACATTACGTTAAGTGGCTAAGCGA--AAAG-TACAAAG 157  
E.faecium\_aroF AC-ACGACTTACAGCCACGTAGAGAAATTCATCTAT---AGTGGCTATTT-TATATTT 145  
C.maltaromaticum GT-GCAAAATTC-GCCACATAGATTGATTGATAAAAT-CTAAGTGGCT-TAC-TAAATTT 155  
S.gallolyticus TGTTG--AGAAAAGCCGATTAGATACTTTGAGT--T-CTAATTTGGCAA-GTAAGATA-- 151  
S.thermophilus GAT---GGATTAGCCGATTAGATGAA--GAGG--T-CTAACCGGTGACATAGGCTAGC 149  
S.agalactiae GATGAA-AGCAGAGCCGATTAGATCATTTCAATAAT--CTAGTTGGTTAAGGCAATATTT 163

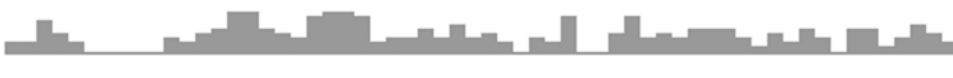

.....  
S.pneumoniae TTGTTAGGTTATTT-CAAGTA----CCC GTTTAGA--TAGT--ATCTAGGCGGTTTTTTG 208  
S.parasanguinis TTGTTGGAGAATTT-CAAGCA----TCC GTTTAGA--GAATG-ATCTAAGCGGATTTTTTT 207  
A.urinae ATATGCTATTATTC-AGCCCA----TTT AGTTTT--TTCCA-AACTAGGTGGGCTTTTTT 205  
S.uberis AGTTCAAGTGTATTTTACCTA----CCTCTCTATATGTGTCA-GACCATTTAGATATTCT 207  
E.faecium TAAA---AGTATCAAGCATTTC-TACTTTTTCAATTTATTTTCC-- 206  
E.hirae TAATACCGATTTCTTACTTACATACTCTTTTCGATACTCAATCCATTTAGACGTTTTGTCT 217  
E.faecium\_aroF TTGCAGCGCTTTTTTCAAGGCTC---GTTGAAGATGTTCACT--GTAGAGCAATTTCTCT 198  
C.maltaromaticum AACTGACAGAATTTTTTGTGTCAG---TCTGAAGACATTCACTTTGGATTTTATCAAATCTT 211  
S.gallolyticus -TGTTTTTACGCATGTATTGA--AAACCAGTTAGACTTTTGA-GCCTAGCTGGTTTTTATT 207  
S.thermophilus TTGTGCTAGTCAAGATGCAGA--GAACCAGTTGGGTCTGT---CCTAGCTGGTTTTTCC 203  
S.agalactiae TTTCGCCCTCCCGTGCACAGA--GGAATTGAGAGAAATAATT-AACCACTAGATGTGAG 220

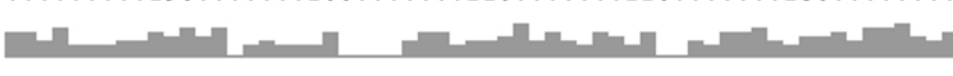

.....  
S.pneumoniae TTTTATCTTTTCTGAGAAGGAG----- 230  
S.parasanguinis ATTTAT-TTTGCAGAAAAGGA----- 227  
A.urinae TTATACCTTTTGGGGAGTGATAGTA----- 231  
S.uberis AAATGGTCTTATTT----- 221  
E.faecium ----- 206  
E.hirae AAATGGATTTTTTGTTTTCAA AATTGAAGGAG 249  
E.faecium\_aroF ACAGGGACATCTTTTTTTGTTGATT----- 223  
C.maltaromaticum A-GTGGATGTCT----- 222  
S.gallolyticus -TATTGTGGCTGATGTAGA ACTAAG----- 231  
S.thermophilus ATGCCGCGGTCTAT----- 217  
S.agalactiae GTCTAGTTGG----- 230

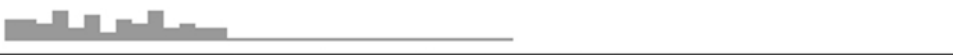

| Abbreviation     | species                                     | Acc. number     | downstream protein | Protein annotation                                               |
|------------------|---------------------------------------------|-----------------|--------------------|------------------------------------------------------------------|
| S.agalactiae     | <i>Streptococcus agalactiae</i> NEM316      | NC_004368.1     | gbs2033            | ABC transporter substrate-binding protein                        |
| S.pneumoniae     | <i>Streptococcus pneumoniae</i> SPNA45      | NC_018594.1     | SPNA45_00365       | substrate-binding protein (pseudogene)                           |
| S.gallolyticus   | <i>Streptococcus gallolyticus</i> UCN34     | NC_013798.1     | GALLO_0122         | ABC transporter substrate-binding protein                        |
| S.thermophilus   | <i>Streptococcus thermophilus</i> LMG 18311 | NC_006448.1     | stu0201            | ABC transporter substrate binding                                |
| S.uberis         | <i>Streptococcus uberis</i> 0140J           | embj AM946015.1 | SUB0137            | ABC transporter substrate-binding protein                        |
| C.maltaromaticum | <i>Carnobacterium maltaromaticum</i> LMA28  | embj HE999757.2 | BN424_2221         | ABC transporter substrate-binding protein                        |
| E.hirae          | <i>Enterococcus hirae</i> ATCC 9790         | gb CP003504.1   | EHR_05180          | ABC-type uncharacterized transport system                        |
| A.urinae         | <i>Aerococcus urinae</i> ACS120VCol10a      | gb CP002512.1   | HMPREF9243_1135    | ABC transporter substrate binding protein                        |
| S.parasanguinis  | <i>Streptococcus parasanguinis</i> FW213    | NC_017905.1     | Spaf_1564          | ABC transporter substrate-binding protein                        |
| E.faecium        | <i>Enterococcus faecium</i> NRRL B-2354     | gb CP003583.1   | M7W_2682           | ABC superfamily ATP binding cassette                             |
| E.faecium_aroF   | <i>Enterococcus faecium</i> NRRL B-2354     | gb CP004063.1   | M7W_1273           | aroF:2-keto-3-deoxy-D-arabino-heptulosonate-7-phosphate synthase |
