# Supplementary material for: Single nucleotide resolution RNA-seq uncovers new regulatory mechanisms in the opportunistic pathogen Streptococcus agalactiae
Source: PubMed Central journal article supplement (PMC4448216; doi:10.1186/s12864-015-1583-4), 2015-05-30
Supplement: 12864_2015_1583_MOESM16_ESM.pdf [file 12864_2015_1583_MOESM16_ESM.pdf]

## Additional File 16: Bacterial strains

| Strain         | Description                                                                       | Source or reference |
|----------------|-----------------------------------------------------------------------------------|---------------------|
| NEM316         | Serotype III isolated from neonate blood culture, ST23                            | [1]                 |
| $\Delta covRS$ | NEM2089 strain: NEM316 $covSR\Omega_{aphA-3}'$ ; $\Delta covSR$ , Km <sup>R</sup> | [2]                 |
| $\Delta RelRS$ | NEM316 $\Delta gbs1397-1398$                                                      | This study          |
| $\Delta ciaRH$ | NEM316 $\Delta ciaRH$                                                             | This study          |

### References:

- [1] Gaillot O, Poyart C, Berche P, Trieu-Cuot P (1997) Molecular characterization and expression analysis of the superoxide dismutase gene from *Streptococcus agalactiae*. *Gene* 204: 213-218.
- [2] Lamy MC, Zouine M, Fert J, Vergassola M, Couve E, et al. (2004) CovS/CovR of group B streptococcus: a two-component global regulatory system involved in virulence. *Mol Microbiol* 54: 1250-1268.
