# Supplementary material for: Single nucleotide resolution RNA-seq uncovers new regulatory mechanisms in the opportunistic pathogen Streptococcus agalactiae
Source: PubMed Central journal article supplement (PMC4448216; doi:10.1186/s12864-015-1583-4), 2015-05-30
Supplement: 12864_2015_1583_MOESM17_ESM.pdf [file 12864_2015_1583_MOESM17_ESM.pdf]

## Additional file 17: Oligonucleotides used in this study

| Oligonucleotide                 | Sequence (5' to 3')                               |
|---------------------------------|---------------------------------------------------|
| <b>Mutant construction</b>      |                                                   |
| <i>ciaR</i> _Eco                | CTAGAATTCCGATGGGAATTTCAAACGAC                     |
| <i>ciaR</i> _Int1               | GGCACGCCCCGGGTGCTGCCGCGGAAAGACTCAAGTCATCTTC       |
| <i>ciaH</i> _Int2               | GCGGCAGCACCCGGGCGTGCCGATAATAAACCTAGAGGCAGT        |
| <i>ciaH</i> _Bam                | CAGGATCCGGCGCTCTGTAAACTTTTCG                      |
| <i>relR</i> _Eco                | CGTCGGAATTCGTTACCTGTAACAGTAGATTCTGC               |
| <i>relR</i> _int1               | GGCACGCCCCGGGTGCTGCCGCGACACGTGACATCTGTTCTTCATC    |
| <i>relS</i> _int2               | GCGGCAGCACCCGGGCGTGCCCATGATACCATTACCTTTGTTCATT    |
| <i>relS</i> _Bam                | TCTAAGGATCCTGCCTCCAAATCTTCATC                     |
| <b>Probes for Northern blot</b> |                                                   |
| Srn008                          | ACTCAGGAGGCAACACCTCTACCTAATACCTTCAATAAGTATTTTT    |
| Srn015                          | TCAGGAGATTTATGAAAAAGGAAAATAATTTAGGATAATATTTTCCTA  |
| Srn017                          | TATAAACATGAGTGTAAAGACCTCAAAGGTAGACAAATCTAGCTCCTC  |
| Srn024                          | ATATTAGGAGATTGTTCTTCATCAGTAAAACAAAGAACATGAAAA     |
| Srn046                          | GAAATTACAAGTAGTAGTAAGCTAAGGGCACCTTTTCAAGTGTGACAA  |
| Srn070                          | AACTTTCTGGTTTTTTCGTAGTTGCAGTATGCTTTCAAATAGAAAAAAC |
| Srn073                          | TCTGTCTTCCTTAAATTATATAAGGACTTATGTGTCACCGTTACT     |
| <b>Primers for qRT-PCR</b>      |                                                   |
| qcrRNA10_F                      | GCGGTTTATCCTAGCCGTTA                              |
| qcrRNA10_R                      | GGGTTGGAAAAAGGGTTGAG                              |
| qcrRNA11_F                      | CTTTTCTTTTCATGTTCCTTTGTTTT                        |
| qcrRNA11_R                      | TGAGTTGCAAATATTAGGAGATTG                          |
| qcrSrn073_F                     | TGTTGCAAACAGTCACAAGGA                             |
| qcrSrn073_R                     | AGCATGCGCTAATGGTAATGA                             |
| qcrSrn071_F                     | ATCACAGATGTGGAGGTATGTTATG                         |
| qcrSrn071_R                     | AGTCGGTAAGAAAAATCTATTCTGAAA                       |
| cylE_F                          | CCAGACGGTAGGCCTTTAACT                             |
| cylE_R                          | AGTGATTGCCTGTCCACTACG                             |
